# Supplementary material for: Corticosteroid co-treatment induces resistance to chemotherapy in surgical resections, xenografts and established cell lines of pancreatic cancer
Source: PubMed Central journal article supplement (PMC1434760; doi:10.1186/1471-2407-6-61), 2006-03-15

# Fresh pancreatic carcinoma cells treated with gemcitabine +/- DEX immediately after resection

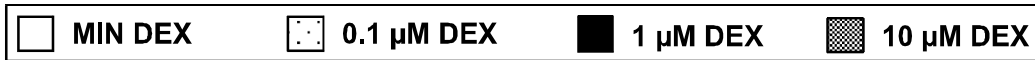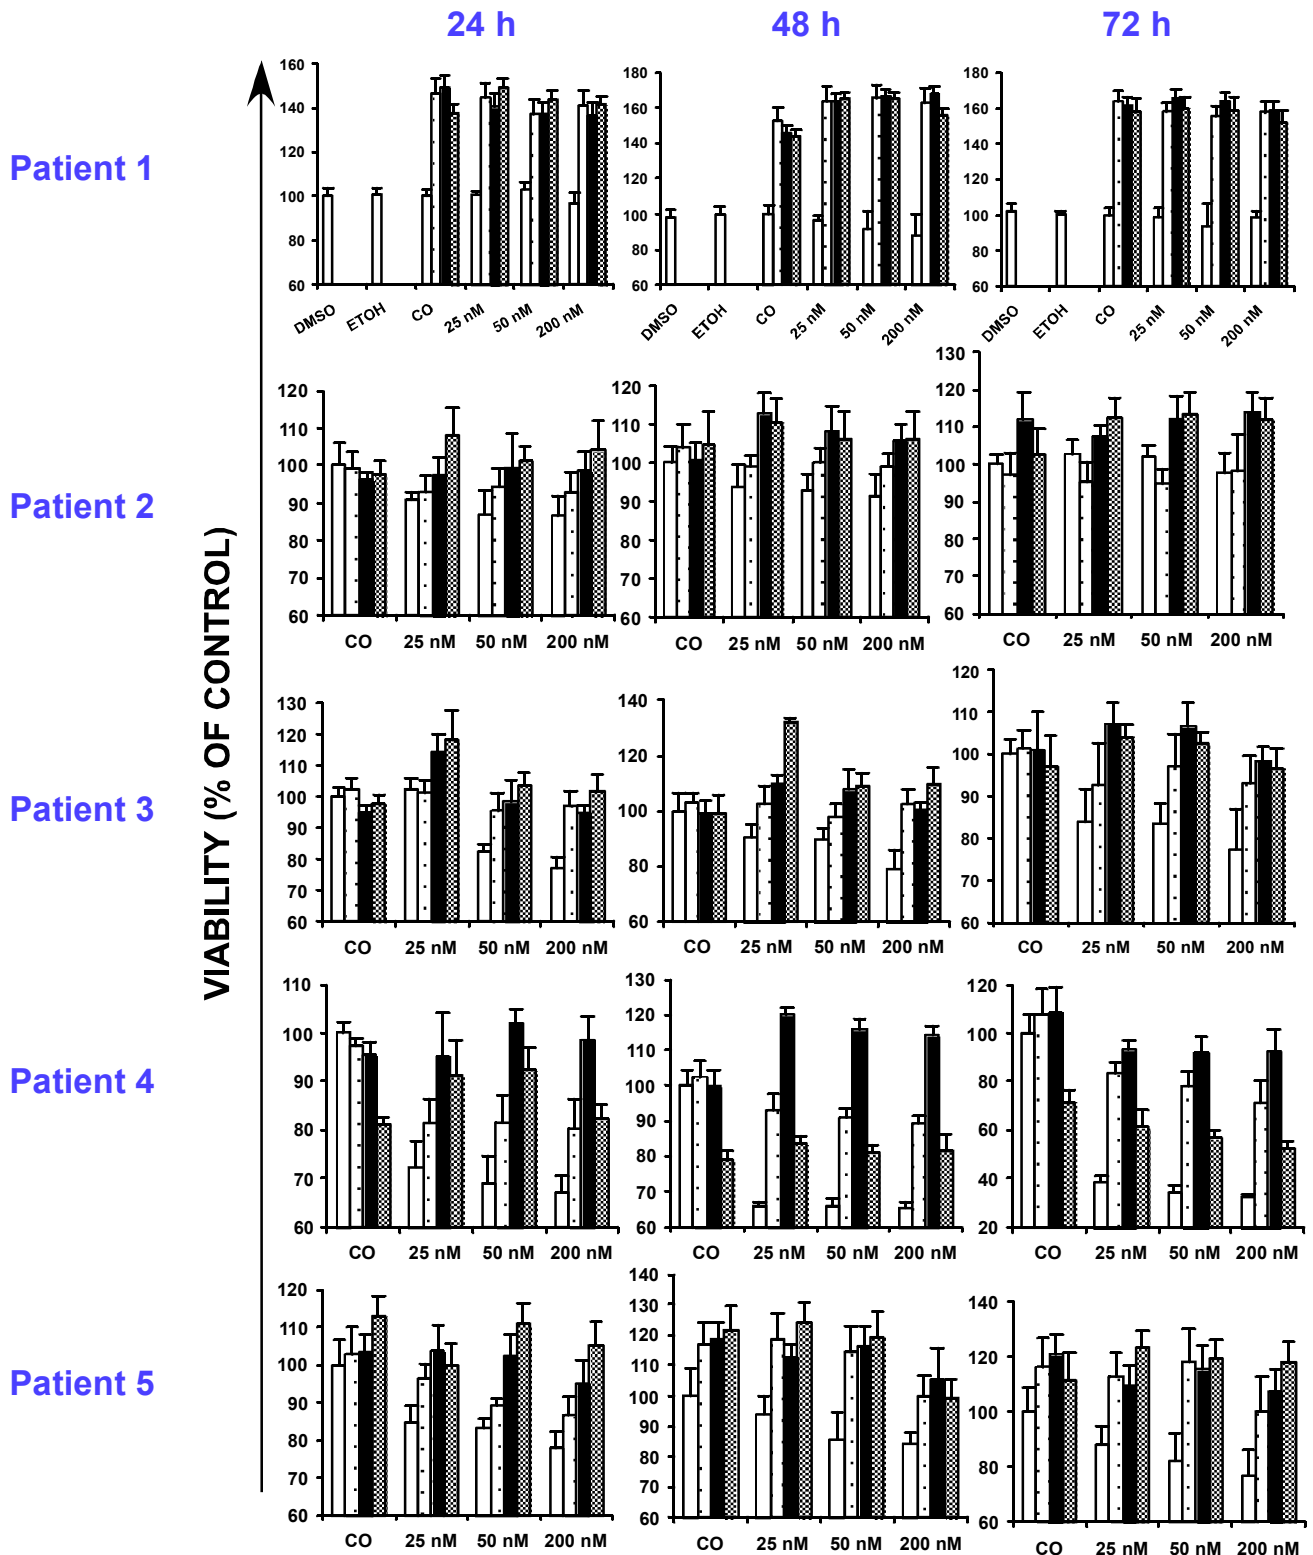

Supplement: 1471-2407-6-61-S2.pdf [file 1471-2407-6-61-S2.pdf]
